1

**Type of article:** Research article

1 Risk factors associated with mortality in hospitalized patients with  
2 SARS-CoV-2 infection. A prospective, longitudinal, unicenter study in  
3 Reus, Spain

4 **Simona Iftimie**<sup>1</sup>, **Ana F. López-Azcona**<sup>1</sup>, **Manuel Vicente-Miralles**<sup>1</sup>, **Ramon Descarrega-Reina**  
5 **<sup>1</sup>, Anna Hernández-Aguilera**<sup>2,3</sup>, **Francesc Riu**<sup>3</sup>, **Josep M. Simó**<sup>4</sup>, **Pedro Garrido**<sup>5</sup>, **Jorge Joven**<sup>2</sup>,  
6 **Jordi Camps**<sup>2,\*</sup>, **Antoni Castro**<sup>1</sup>

7 <sup>1</sup> Department of Internal Medicine, Hospital Universitari de Sant Joan, Institut d'Investigació  
8 Sanitària Pere Virgili, Universitat Rovira i Virgili, Reus, Spain

9 <sup>2</sup> Unitat de Recerca Biomèdica, Hospital Universitari de Sant Joan, Institut d'Investigació  
10 Sanitària Pere Virgili, Universitat Rovira i Virgili, Reus, Spain

11 <sup>3</sup> Department of Pathology, Hospital Universitari de Sant Joan, Institut d'Investigació Sanitària  
12 Pere Virgili, Universitat Rovira i Virgili, Reus, Spain

13 <sup>4</sup> Laboratori de Referència del Camp de Tarragona i Terres de l'Ebre, Reus, Spain

14 <sup>5</sup> Intensive Care Unit, Hospital Universitari de Sant Joan, Institut d'Investigació Sanitària Pere  
15 Virgili, Universitat Rovira i Virgili, Reus, Spain

16

17 \* [jcamp@grupsagessa.com](mailto:jcamp@grupsagessa.com)

18 **Short title:** Mortality from SARS-CoV-2 infection.

2

19 **ABSTRACT**

20 Spain is one of the countries that has suffered the most from the impact of severe acute  
21 respiratory syndrome coronavirus 2 (SARS-CoV-2), the strain that causes coronavirus disease  
22 2019 (COVID-19). However, there is a lack of information on the characteristics of this disease in  
23 the Spanish population. The objective of this study has been to characterize our patients from  
24 an epidemiological point of view and to identify the risk factors associated with mortality in our  
25 geographical area. We performed a prospective, longitudinal study on 188 hospitalized cases of  
26 SARS-Cov-2 infection in *Hospital Universitari de Sant Joan*, in Reus, Spain, admitted between  
27 15<sup>th</sup> March 2020 and 30<sup>th</sup> April 2020. We recorded demographic data, signs and symptoms and  
28 comorbidities. We also calculated the Charlson and McCabe indices. A total of 43 deaths  
29 occurred during the study period. Deceased patients were older than the survivors ( $77.7 \pm 13.1$   
30 *vs.*  $62.8 \pm 18.4$  years;  $p < 0.001$ ). Logistic regression analyses showed that fever, pneumonia,  
31 acute respiratory distress syndrome, diabetes mellitus and cancer were the variables that  
32 showed independent and statistically significant associations with mortality. The Charlson index  
33 was more efficient than the McCabe index in discriminating between deceased and survivors.  
34 This is one of the first studies to describe the factors associated with mortality in patients  
35 infected with SARS-CoV-2 in Spain, and one of the few in the Mediterranean area. We identified  
36 the main factors independently associated with mortality in our population. Further studies in  
37 are needed to complete and confirm our findings.

38

39

40

41 **Keywords:** Comorbidity; COVID-19; Epidemiology; Mortality; SARS-CoV-2.

## Introduction

42 In January 2020, a new type of coronavirus was identified as the causative factor in a series of  
43 cases of severe pneumonia in the city of Wuhan, province of Hubei, in the People's Republic of  
44 China [1]. The World Health Organization gave the official name 'COVID-19' for this coronavirus  
45 disease, as well as the term 'severe acute respiratory syndrome coronavirus 2' (SARS-CoV-2) for  
46 the virus [2]. This virus is currently the cause of a global pandemic, producing hundreds of  
47 thousands of hospital admissions and deaths, with enormous effects on the health and life of  
48 the population and serious economic consequences for society. On 1<sup>st</sup> February, 2020, the first  
49 case of a SARS-CoV-2 positive patient in Spain was reported on the island of La Gomera [3] and,  
50 following that, the first cases diagnosed in the autonomous region of Catalonia date from 5<sup>th</sup>  
51 March [4]. The incubation period for SARS-CoV-2 ranges from 5 to 6 days on average, with cases  
52 being possible from 0 to 14 days [5]. The most common period of transmission of the virus  
53 begins 1-2 days before the onset of symptoms, and lasts for up to 5-6 days after the onset of  
54 symptoms [6]. The basic reproductive rate  $R$  (the average of new cases secondary to a primary  
55 case) in our country is, at the time of writing, estimated to be  $<1$ ; globally, the  $R$  number ranges  
56 from 0 to 6 depending on various factors, in particular the political and public health measures  
57 imposed by the various governments that focus on complete cleaning of public spaces and a  
58 decrease in contact between individuals [7]. Identifying the epidemiological characteristics of  
59 this disease will help appropriate decisions to be made and thus to control the epidemic. Certain

4

60 clinical symptoms of COVID-19 have been reported previously. The most frequent are: fever, dry  
61 cough, asthenia, expectoration, dyspnea, sore throat, headache, myalgia, arthralgia, chills,  
62 nausea or vomiting, nasal congestion, diarrhea, hemoptysis and conjunctival congestion (from  
63 highest to lowest frequency) [8,9]. Occasionally, symptoms of a different nature appear:  
64 neurological, such as altered consciousness or dizziness; cardiological, such as acute myocardial  
65 damage or heart failure; or ophthalmological, such as dry eye, blurred vision, foreign body  
66 sensation and conjunctival congestion [10-13].

67 To date, there is still a lack of information on the characteristics of SARS-CoV-2 infection  
68 outside China. Spain is one of the Western European countries that has suffered  
69 the most from the impact of COVID-19 and this pandemic has had a great impact on our public  
70 health system. The present study reports the results of an analysis of all cases hospitalized in  
71 the *Hospital Universitari de Sant Joan*, which is affiliated to the *Universitat Rovira i Virgili*, in  
72 Reus, Catalonia, Spain. The objective of the present study has been to characterize our patients'  
73 epidemiology and to identify the risk factors associated with mortality for this disease in our  
74 geographical area.

## 75 **Materials and Methods**

### 76 **Study design**

77 This is a prospective longitudinal study conducted on all hospitalized cases of SARS-CoV-2  
78 infection in *Hospital Universitari de Sant Joan*, in Reus, Spain admitted between 15<sup>th</sup> March  
79 2020 and 30<sup>th</sup> April 2020. This hospital has 392 beds provided for hospitalization and social

5

80 health care and is part of the Hospital Network for Public Use in Catalonia. It acts as a general  
81 hospital for a population of over 175,000 inhabitants, including primary care centers and  
82 residences for the elderly in the area. It is a reference center for the specialities of Oncology and  
83 Radiotherapy for the whole of the Tarragona province, which has a population of 550,000  
84 inhabitants. SARS-CoV-2 infection was confirmed by reverse transcription-polymerase chain  
85 reaction (RT-PCR) using swab samples from the upper respiratory tract  
86 (nasopharyngeal/oropharyngeal exudate), from the lower respiratory tract  
87 (sputum/endotracheal aspirate/bronchoalveolar lavage/bronchial aspirate) or from the lower  
88 digestive tract (rectal smear). Tests were carried out with the VIASURE SARS-CoV-2 Real Time  
89 PCR Detection Kit that detects *ORF1ab* and *N* genes (CerTest Biotec, Zaragoza, Spain). RNA was  
90 extracted in a QIAcube apparatus with RNeasy reagents (Qiagen N.V., Hilden, Germany)  
91 according to the manufacturer's instructions, and analyses were carried out in a 7500 Fast RT-  
92 PCR System (Applied Biosystems, Foster City, CA, USA). We recorded demographic data,  
93 comorbidities, and other acute or chronic infections. We also calculated the McCabe score as an  
94 index of clinical prognosis [14] and the Charlson index (abbreviated version) as a way of  
95 categorizing a patient's comorbidity [15]. The only inclusion criterion was to be a hospitalized  
96 patient with an analytical diagnosis of SARS-CoV-2. We excluded hospitalized patients with  
97 suspected SARS-CoV-2 infection but without laboratory confirmation, or patients who did not  
98 require hospitalization, with or without laboratory diagnosis of SARS-CoV-2 infection. Thirty-  
99 four patients required transfer to the Intensive Care Unit based on the attending specialist's

6

100 criteria, and taking into account the CURB65 scale and the ATS/IDSA criteria [16,17]. This study  
101 was approved by the Ethics Committee of our Institution (Resolution CEIM 040/2018, amended  
102 on 16 April 2020).

### 103 **Statistical analyses**

104 Data are shown as means and standard deviations or as numbers and percentages. Statistical  
105 comparisons between two groups were carried out with the Student's *t* test (quantitative  
106 variables) or the  $\chi$ -square test (categorical variables). Logistic regression models were fitted to  
107 investigate the combined effect of selected variables on mortality. The diagnostic accuracy of  
108 the McCabe and Charlson indices in predicting mortality was assessed by receiver operating  
109 characteristics (ROC) analysis [18]. Statistical significance was set at  $p \leq 0.05$ . All calculations  
110 were made using the SPSS 25.0 statistical package (SPSS Inc., Chicago, IL, USA).

### 111 **Results**

112 During the study period, a total of 188 patients were hospitalized for SARS-CoV-2 infection. The  
113 mean age was  $66.4 \pm 18.4$  years (Range: 0 - 102) and a small majority were men (55.8 vs. 44.2%;  
114  $p < 0.001$ ). One hundred and eighteen patients were admitted to the Department of Internal  
115 Medicine, 34 to the Intensive Care Unit, and 36 to the Social Health Unit. Thirty-two patients  
116 were admitted to hospital due to causes unrelated to the suspicion of COVID-19 infection but  
117 gave a positive result in the RT-PCR. A total of 43 deaths occurred during the entire study period  
118 (Fig. 1), so the case fatality rate was 22.9% based on the total number of COVID-19 hospitalized  
119 patients. Deceased patients were significantly older than the survivor patients ( $77.7 \pm 13.1$  vs.

7

120 62.8 ± 18.4 years;  $p < 0.001$ ). A total of 125 patients (66.5%) had chronic underlying diseases.  
121 The relationships between COVID-19 and the demographic and clinical variables are shown in  
122 Table 1 and Fig. 2. Most of the cases and deaths were of patients between 70 and 89 years old  
123 (Fig. 2A). The signs and symptoms present in more than 50% of the patients were, in descending  
124 order, fever (64.9%), dyspnea (58.0%), pneumonia (57.4%), and cough (51.6%) (Fig. 2B). The  
125 most relevant comorbidities were cardiovascular diseases (50.5%), type 2 diabetes mellitus  
126 (26.0%), and chronic neurological diseases (19.1%) (Fig. 2C). We also evaluated whether  
127 patients had had any behaviour that might be considered risky in the days prior to admission,  
128 and we observed that a high proportion of patients had attended another health center in the  
129 previous month or had been in contact with people infected with SARS-CoV-2 or with  
130 respiratory problems over the previous 14 days (Fig. 2F). Five employees of our institution or  
131 the associated residences were hospitalized for COVID-19, although not requiring either  
132 intensive measures or ventilatory support.

133 Most of the patients presented low values on the Charlson and McCabe indices and, as  
134 expected, higher scores were associated with higher mortality (Fig. 2 D and E). When comparing  
135 the diagnostic accuracy of the ROC curves of these indices in their ability to discriminate  
136 between deceased patients and survivors, we found that Charlson index was more efficient,  
137 with higher values of the area under the curve (Fig. 3).

138 Finally, since the different symptoms and comorbidities can be mutually interdependent  
139 and present cause-effect relationships between them, we wanted to identify which factors were

8

140 independently associated with mortality. Logistic regression analyses showed that the presence  
141 of fever, pneumonia, acute respiratory distress syndrome, type 2 diabetes mellitus and cancer  
142 were the only variables that showed an independent and statistically significant association with  
143 mortality when they were adjusted for differences in age, gender, smoking status and alcohol  
144 intake (Tables 2 and 3) .

## 145 **Discussion**

146 We carried out a RT-PCR determination for all the patients admitted to our center, regardless of  
147 the diagnosis. Thirty-two patients (17.0%) admitted for reasons other than suspected SARS-CoV-  
148 2 infection gave a positive result despite not presenting any symptoms. We believe that this is  
149 important since it highlights the need to perform diagnostic tests for this disease in all  
150 hospitalized patients, something which has not been given sufficient attention in the scientific  
151 literature.

152 Most of our patients were over 60 years old and mortality was very high (47.0%) among  
153 those over 80 years old. These results are consistent with those published so far, which show  
154 that age is one of the most important risk factors for COVID-19 [19-22]. It is accepted that age is  
155 a risk factor for respiratory diseases [19,23,24] and impairment of immune function associated  
156 with age has been identified as a major cause of high mortality due to severe pneumonia [23].  
157 Among the signs and symptoms of the disease, we found that fever, pneumonia, and acute  
158 respiratory distress syndrome were the only factors independently associated with mortality  
159 when adjusted for age, smoking and alcohol intake. These factors are among those that have



9

160 been most frequently found in patients with COVID-19 in most of the studies conducted in  
161 China [19,25,26]. We did not observe any independent relationship between cough, chills or  
162 gastrointestinal disturbances and mortality, despite being present in a relatively high proportion  
163 of subjects, something which differs from what has been published previously [19].

164         The comorbidities showing a significant relationship with mortality were type 2 diabetes  
165 mellitus and cancer. We did not find any independent association with any other chronic  
166 metabolic disease, such as cardiovascular disease or others. The univariate analysis showed a  
167 high number of patients with these chronic alterations and the logistic regression analysis  
168 identified diabetes as the most relevant. Indeed, all of these metabolic diseases are closely  
169 related. Diabetes is a causative factor of hypertension and metabolic syndrome and these, in  
170 turn, can cause heart, vascular, liver, neurological and kidney diseases. Our study therefore  
171 suggests that diabetes might be a triggering factor for these disorders and therefore is related  
172 to mortality in patients infected with SARS-CoV-2. Type 2 diabetes mellitus has also been  
173 reported to be one of the most important factors related with COVID-19 severity in previous  
174 investigations conducted in China, Israel and Italy [25,27-29]. Indeed, the Italian study reported  
175 that 2/3 of the patients who died were diabetic [29]. Furthermore, diabetes is linked to a higher  
176 mortality in other viral infections, such as those caused by influenza A(H1N1), MERS-CoV and  
177 SARS-CoV viruses [30,31]. We also found a close relationship between cancer and COVID-19  
178 mortality. One aspect that caught our attention is that, despite our hospital being the reference  
179 center for Oncology in our province, the number of cancer patients infected with COVID-19 was

10

180 relatively low. It might be that the corticosteroids often prescribed for the treatment of these  
181 patients offered some protection, as some studies have suggested [32] or perhaps these  
182 patients were more careful than the general population during confinement, which  
183 unfortunately cannot be proven. Having said that, the relationship between cancer and the  
184 mortality of our patients was evident. Patients with cancer are often immunosuppressed and as  
185 a result they are more likely to worsen rapidly if infected by SARS-Cov-2. Wuhan studies report  
186 that the incidence of cancer is higher in COVID-19 patients than in the general population  
187 [33,34]. However, definitive conclusions on this issue are hampered by the small sample size,  
188 the retrospective nature of most studies, the limited follow-up duration, and the heterogeneity  
189 of the disease and treatment strategies [35,36].

190 The influence of smoking on COVID-19 is controversial. An unusually low prevalence of  
191 current smoking among infected patients was observed in China [37] and the plausibility of  
192 using medicinal nicotine to lower infection and mitigate disease severity has been proposed  
193 [38]. However, other studies indicate that smokers might be at higher risk because nicotine can  
194 directly impact the putative receptor for the virus (angiotensin-converting enzyme 2) and lead  
195 to harmful signaling in lung epithelial cells [39]. In the present study, we have found no firm  
196 positive or negative relationship between tobacco use and mortality because only 9 patients  
197 (4.8%) were active smokers at the time of the study. That might be explained by their generally  
198 advanced age and because many of them were suffering from chronic ailments that had advised  
199 them to quit tobacco use.

11

200 A novel aspect of our study has been to investigate the usefulness of some frequently  
201 used clinical scores in the evaluation of infectious diseases. For example, the Charlson index,  
202 which categorizes comorbidity might be more useful than the McCabe index in predicting death  
203 in these patients. A limitation of the present study is the small sample size. Ours is not a big  
204 hospital and covers a relatively small geographical area. However, we believe that the results  
205 obtained are relevant since they might be representative of many similar centers in Western  
206 Europe and in the Mediterranean area, and little information is yet available on this issue.

## 207 **Conclusion**

208 This is one of the first studies to describe the factors related with death in patients infected with  
209 SARS-CoV-2 in Spain, and one of the few from the Mediterranean basin. Our results identify age,  
210 fever, pneumonia, acute respiratory distress syndrome, type 2 diabetes mellitus and cancer as  
211 independent factors predicting lethality. Further studies are needed in similar centers to  
212 complete and confirm our findings.

## 213 **Acknowledgments**

214 This study was supported by a grant from the *Fundació la Marató de TV3* (201807-10),  
215 Barcelona, Spain. The authors are indebted to all the staff of the *Hospital Universitari de Sant*  
216 *Joan*, doctors, nurses, assistants, cleaning and security personnel, and all the volunteer  
217 students, who with their enormous effort are managing to overcome this dramatic situation.  
218 Editorial assistance was provided by Phil Hoddy at the Service of Linguistic Resources of the  
219 *Universitat Rovira i Virgili*.

12

## 220 **CRedit authorship contribution statement**

221 **Simona Iftimie:** Conceptualization, Data curation, Formal analysis, Investigation, Methodology,  
222 Project administration, Resources, Supervision, Validation, Funding acquisition, Writing - original  
223 draft, Writing - review & editing. **Ana F. López-Azcona:** Data curation, Investigation,  
224 Methodology, Writing - review & editing. **Manuel Vicente-Miralles:** Data curation, Investigation,  
225 Methodology, Writing - original draft, Writing - review & editing. **Ramon Descarrega-Reina:**  
226 Data curation, Investigation, Methodology. **Anna Hernández-Aguilera:** Data curation, Formal  
227 analysis, Investigation, Methodology, Software, Writing - original draft, Writing - review &  
228 editing. **Francesc Riu:** Investigation, Resources. **Josep M. Simó:** Investigation, Resources. **Pedro**  
229 **Garrido:** Investigation, Resources. **Jorge Joven:** Investigation, Resources. **Jordi Camps:**  
230 Conceptualization, Data curation, Formal analysis, Investigation, Methodology, Project  
231 administration, Resources, Supervision, Validation, Funding acquisition, Writing - original draft,  
232 Writing - review & editing, Supervision. **Antoni Castro:** Investigation, Resources, Funding  
233 acquisition.

## 234 **Declaration of Competing Interest**

235 The authors declare that there are no competing interests.

## 236 **Data availability**

237 All relevant data are within the manuscript and its Supporting Information files.

238

239

## 240 **References**

- 241 1. Zhu N, Zhang D, Wang W, Li X, Yang B, Song J, et al. A novel coronavirus from patients  
242 with pneumonia in China, 2019. *N Engl J Med.* 2020; 382: 727-733. doi:  
243 10.1056/NEJMoa2001017.
- 244 2. World Health Organization. Naming the coronavirus disease (COVID-19) and the virus  
245 that causes it. Available at [https://www.who.int/emergencies/diseases/novel-](https://www.who.int/emergencies/diseases/novel-coronavirus-2019/technical-guidance/naming-the-coronavirus-disease-(covid-2019)-and-the-virus-that-causes-it)  
246 [coronavirus-2019/technical-guidance/naming-the-coronavirus-disease-\(covid-2019\)-and-](https://www.who.int/emergencies/diseases/novel-coronavirus-2019/technical-guidance/naming-the-coronavirus-disease-(covid-2019)-and-the-virus-that-causes-it)  
247 [the-virus-that-causes-it](https://www.who.int/emergencies/diseases/novel-coronavirus-2019/technical-guidance/naming-the-coronavirus-disease-(covid-2019)-and-the-virus-that-causes-it). Accessed May 26, 2020.
- 248 3. Ballester-Arnal R, Gil-Llario MD. The virus that changed Spain: Impact of COVID-19 on  
249 people with HIV. *AIDS Behav.* 2020; 1-5. doi: 10.1007/s10461-020-02877-3.
- 250 4. Santamaria L, Hortal J. Chasing the ghost of infection past: identifying thresholds of  
251 change during the COVID-19 infection in Spain. *MedRxiv* doi:  
252 <https://doi.org/10.1101/2020.04.09.20059345>.
- 253 5. Li Q, Guan X, Wu P, Wang X, Zhou L, Tong Y, et al. Early transmission dynamics in Wuhan,  
254 hina, of novel coronavirus-infected pneumonia. *N Engl J Med.* 2020; 382:1199-1207. doi:  
255 10.1056/NEJMoa2001316.
- 256 6. Anderson RM, Heesterbeek H, Klinkenberg D, Hollingsworth TD. How will country-based  
257 mitigation measures influence the course of the COVID-19 epidemic? *Lancet.* 2020;  
258 395:931-934. doi: 10.1016/S0140-6736(20)30567-5.

14

- 259 7. Zhang S, Diao M, Yu W, Pei L, Lin Z, Chen D. Estimation of the reproductive number of  
260 novel coronavirus (COVID-19) and the probable outbreak size on the Diamond Princess  
261 cruise ship: A data-driven analysis. *Int J Infect Dis* 2020; 93:201-204. doi:  
262 10.1016/j.ijid.2020.02.033.
- 263 8. Lovato A, de Filippis C. Clinical presentation of COVID-19: A systematic review focusing  
264 on upper airway symptoms. *Ear Nose Throat J.* 2020; Apr.13:145561320920762. doi:  
265 10.1177/0145561320920762. [Epub ahead of print].
- 266 9. Jin Y, Yang H, Ji W, Wu W, Chen S, Zhang W, et al. Virology, epidemiology, pathogenesis,  
267 and control of COVID-19. *Viruses*, 2020; 12:pii: E372. doi: 10.3390/v12040372.
- 268 10. Baig AM. Neurological manifestations in COVID-19 caused by SARS-CoV-2. *CNS Neurosci*  
269 *Ther.* 2020; 26:499-501. doi: 10.1111/cns.13372.
- 270 11. Zheng YY, Ma YT, Zhang JY, Xie X. COVID-19 and the cardiovascular system. *Nat Rev*  
271 *Cardiol.* 2020; 17:259-260. doi: 10.1038/s41569-020-0360-5.
- 272 12. Wu P, Duan F, Luo C, Liu Q, Qu X, Liang L, et al. Characteristics of ocular findings of  
273 patients with coronavirus disease 2019 (COVID-19) in Hubei Province, China. *JAMA*  
274 *Ophthalmol.* 2020: Mar 31. doi: 10.1001/jamaophthalmol.2020.1291. [Epub ahead of  
275 print].
- 276 13. Chen L, Liu M, Zhang Z, Qiao K, Huang T, Chen M, et al. Ocular manifestations of a  
277 hospitalised patient with confirmed 2019 novel coronavirus disease. *Br J Ophthalmol.*

15

- 278 2020; pii:bjophthalmol-2020-316304. doi: 10.1136/bjophthalmol-2020-316304. [Epub  
279 ahead of print].
- 280 14. McCabe WR, Jackson JJ. Gram-negative bacteremia. I. Etiology and ecology. Arch Intern  
281 Med. 1962; 110:847–864.
- 282 15. Berkman LF, Leo-Summers L, Horwitz RI. Emotional support and survival after myocardial  
283 infarction. A prospective, population-based study of the elderly. Ann Intern Med. 1992;  
284 117: 1003–1009.
- 285 16. Hai-yan L, Guo Q, Song W, Zhou Y, Li M, Chen X, et al. Modified IDSA/ATS minor criteria  
286 for severe community-acquired pneumonia best predicted mortality. Medicine  
287 (Baltimore) 2015; 94:e1474. doi: 10.1097/MD.0000000000001474.
- 288 17. Lim WS, van der Eerden MM, Laing R, Boersma WG, Karalus N, Town GI, et al. Defining  
289 community acquired pneumonia severity on presentation to hospital: an international  
290 derivation and validation study. Thorax. 2003; 58:377-382.
- 291 18. Zweig MH, Campbell G. Receiver-operating characteristic (ROC) plots: a fundamental  
292 evaluation tool in clinical medicine. Clin Chem. 1993; 39:561-577.
- 293 19. Sun H, Ning R, Tao Y, Yu C, Deng X, Zhao C, et al. Risk factors for mortality in 244 older  
294 adults with COVID-19 in Wuhan, China: a retrospective study. J Am Geriatr Soc. 2020;  
295 doi: 10.1111/jgs.16533. [Epub ahead of print].

16

- 296 20. Leung C. Risk factors for predicting mortality in elderly patients with COVID-19: A review  
297 of clinical data in China. *Mech Ageing Dev.* 2020; 188:111255. doi:  
298 10.1016/j.mad.2020.111255.
- 299 21. Liu K, Chen Y, Lin R, Han K. Clinical features of COVID-19 in elderly patients: A  
300 comparison with young and middle-aged patients. *J. Infect.* 2020; pii: S0163-  
301 4453(20)30116-X. doi: 10.1016/j.jinf.2020.03.005. [Epub ahead of print].
- 302 22. Nikpouraghdam M, Jalali Farahani A, Alishiri G, Heydari S, Ebrahimnia M, Samadinia H, et  
303 al. Epidemiological characteristics of coronavirus disease 2019 (COVID-19) patients in  
304 IRAN: A single center study. *J Clin Virol.* 2020; 127:104378. doi:  
305 10.1016/j.jcv.2020.104378.
- 306 23. Chong CP, Street PR. Pneumonia in the elderly: A review of the epidemiology,  
307 pathogenesis, microbiology, and clinical features. *South Med J.* 2008; 101:1141-1145.  
308 doi: 10.1097/SMJ.0b013e318181d5b5.
- 309 24. Shu J Pneumonia in the elderly: understanding the characteristics. *South Med J.* 2008;  
310 101:1086. doi: 10.1097/SMJ.0b013e31818005fc.
- 311 25. Huang R, Zhu L, Xue L, Liu L, Yan X, Wang J, et al. Clinical findings of patients with  
312 coronavirus disease 2019 in Jiangsu province, China: A retrospective, multi-center study.  
313 *PLoS Negl Trop Dis.* 2020; 14:e0008280. doi: 10.1371/journal.pntd.0008280. [Epub  
314 ahead of print].



17

- 315 26. Xu X, Yu C, Qu J, Zhang L, Jiang S, Huang D, et al. Imaging and clinical features of patients  
316 with 2019 novel coronavirus SARS-CoV-2. *Eur J Nucl Med. Mol Imaging* 2020; 47:1275-  
317 1280. doi: 10.1007/s00259-020-04735-9.
- 318 27. Itelman E, Wasserstrum Y, Segev A, Avaky C, Negru L, Cohen D, et al. Clinical  
319 characterization of 162 COVID-19 patients in Israel: Preliminary report from a large  
320 tertiary center. *Isr Med Assoc J.* 2020; 22:271-274. [Epub ahead of print].
- 321 28. Penlioglou T, Papachristou S, Papanas N. COVID-19 and diabetes mellitus: May old anti-  
322 diabetic agents become the new philosopher's stone? *Diabetes Ther.* 2020; 1-3. doi:  
323 10.1007/s13300-020-00830-0. [Epub ahead of print].
- 324 29. Remuzzi A, Remuzzi G. COVID-19 and Italy: what next? *Lancet.* 2020; 395:1225-1228. doi:  
325 10.1016/S0140-6736(20)30627-9.
- 326 30. Badawi A, Ryoo SG. Prevalence of diabetes in the 2009 influenza A (H1N1) and the  
327 Middle East respiratory syndrome coronavirus: A Systematic review and meta-analysis. *J*  
328 *Public Health Res.* 2016; 21:733. doi: 10.4081/jphr.2016.733.
- 329 31. Yang JK, Feng Y, Yuan MY, Yuan SY, Fu HJ, Wu BY. Plasma glucose levels and diabetes are  
330 independent predictors for mortality and morbidity in patients with SARS. *Diabet Med.*  
331 2006; 23:623-628.
- 332 32. Veronese N, Demurtas J, Yang L, Tonelli R, Barbagallo M, Lopalco P. Use of  
333 corticosteroids in coronavirus disease 2019 pneumonia: A systematic review of the  
334 literature. *Front Med (Lausanne).* 2020; 7:170. doi: 10.3389/fmed.2020.00170.

18

- 335 33. Yu J, Ouyang W, Chua MLK, Xie C. SARS-CoV-2 transmission in patients with cancer at a  
336 tertiary care hospital in Wuhan, China. *JAMA Oncol.* 2020; doi:  
337 10.1001/jamaoncol.2020.0980. [Epub ahead of print].
- 338 34. Zhang L, Zhu F, Xie L, Wang C, Wang J, Chen R. Clinical characteristics of COVID-19-  
339 infected cancer patients: a retrospective case study in three hospitals within Wuhan,  
340 China. *Ann Oncol.* 2020; pii: S0923-7534(20)36383-3.  
341 doi:10.1016/j.annonc.2020.03.296. [Epub ahead of print].
- 342 35. Xia Y, Jin R, Zhao J, Li W, Shen H. Risk of COVID-19 for patients with cancer. *Lancet Oncol.*  
343 2020; 21:e180. doi:10.1016/S1470-2045(20)30150-9.
- 344 36. Sidaway P. COVID-19 and cancer: what we know so far. *Nat Rev Clin Oncol.* 2020; doi:  
345 10.1038/s41571-020-0366-2. [Epub ahead of print].
- 346 37. Farsalinos K, Barbouni A, Niaura R. Systematic review of the prevalence of current  
347 smoking among hospitalized COVID-19 patients in China: could nicotine be a therapeutic  
348 option? *Intern Emerg Med.* 2020; doi: 10.1007/s11739-020-02355-7. [Epub ahead of  
349 print].
- 350 38. Tindle HA, Newhouse PA, Freiberg MS. Beyond smoking cessation: Investigating  
351 medicinal nicotine to prevent and treat COVID-19. *Nicotine Tob Res.* 2020; pii: ntaa077.  
352 doi: 10.1093/ntr/ntaa077. [Epub ahead of print].

19

353 39. Olds JL, Kabbani N. Is nicotine exposure linked to cardiopulmonary vulnerability to  
354 COVID-19 in the general population? FEBS J. 2020; doi: 10.1111/febs.15303. [Epub ahead  
355 of print].

356

357

358

359

360

## 361 **Figure legends**

362

363 **Fig. 1. Flow chart showing the distribution of hospitalized patients and the evolution of their**  
364 **disease.** DIM, Department of Internal Medicine; ICU, Intensive Care Unit; SHU, Social Health  
365 Unit.

366

367 **Fig. 2. Distribution of ages, clinical variables, and risk factors among patients with SARS-CoV-2**  
368 **infection.** The numbers above the bars indicate the number of deceased patients. AKF, acute  
369 kidney failure; ARDS, acute respiratory distress syndrome; CKD, chronic kidney disease; CLD,  
370 chronic liver disease; CLUD, chronic lung disease; CND, chronic neurological disease; CVD,  
371 cardiovascular disease; NFD, non-fatal disease; RFD, rapidly fatal disease; T2DM, type 2 diabetes  
372 mellitus; UFD, ultimately fatal disease.

20

373

374 **Fig. 3. Receiver operating characteristics (ROC) plots of Charlson and McCabe indices in**

375 **COVID-19 patients and segregated with respect to mortality. AUC, area under the curve.**

376  
377  
378

**Table 1**  
**Demographic and clinical characteristics of patients with COVID-19 infection.**

| Feature                             | Cases, n (%) |
|-------------------------------------|--------------|
| <b>Age, years</b>                   |              |
| 0-9                                 | 1 (0.53)     |
| 10-19                               | 3 (1.60)     |
| 20-29                               | 4 (2.13)     |
| 30-39                               | 9 (4.79)     |
| 40-49                               | 13 (6.91)    |
| 50-59                               | 29 (15.43)   |
| 60-69                               | 39 (20.74)   |
| 70-79                               | 39 (20.74)   |
| 80-89                               | 41 (21.81)   |
| 90-99                               | 9 (4.79)     |
| 100-109                             | 1 (0.53)     |
| <b>Gender</b>                       |              |
| Male                                | 105 (55.8)   |
| Female                              | 83 (44.2)    |
| <b>Smoking status</b>               |              |
| No                                  | 145 (77.1)   |
| Yes                                 | 9 (4.8)      |
| Ex-smoker                           | 34 (18.1)    |
| <b>Alcohol consumption</b>          |              |
| No                                  | 179 (95.2)   |
| Yes                                 | 9 (4.8)      |
| <b>Signs and symptoms</b>           |              |
| Fever                               | 122 (64.9)   |
| Dyspnea                             | 109 (58.0)   |
| Pneumonia                           | 108 (57.4)   |
| Cough                               | 97 (51.6)    |
| Chills                              | 42 (22.3)    |
| Diarrhea                            | 42 (22.3)    |
| Acute kidney failure                | 18 (9.6)     |
| Odynophagia                         | 13 (6.9)     |
| Acute respiratory distress syndrome | 10 (5.3)     |
| Vomiting                            | 9 (4.8)      |
| Other respiratory symptoms          | 7 (3.7)      |

|                                                 |            |
|-------------------------------------------------|------------|
| <b>Disease risk factors</b>                     |            |
| Cardiovascular disease (including hypertension) | 95 (50.5)  |
| Type 2 diabetes mellitus                        | 49 (26.0)  |
| Chronic neurological disease                    | 36 (19.1)  |
| Chronic lung disease                            | 27 (14.4)  |
| Chronic kidney disease                          | 27 (14.4)  |
| Cancer                                          | 26 (13.8)  |
| Postpartum (< 6 weeks)                          | 2 (1.0)    |
| Chronic liver disease                           | 2 (1.1)    |
| Pregnancy                                       | 1 (0.5)    |
| <b>Risky contacts</b>                           |            |
| Visit to another medical center last month      | 73(38.8)   |
| Contact with SARS-CoV-2 positive last 14 days   | 55 (29.3)  |
| Contact with respiratory infection last 14 days | 54 (28.7)  |
| Travel in the last month                        | 25 (13.3)  |
| Health worker                                   | 5 (2.7)    |
| <b>Charlson index</b>                           |            |
| 0                                               | 81 (43.1)  |
| 1                                               | 40 (21.3)  |
| 2                                               | 42 (22.3)  |
| 3                                               | 16 (8.5)   |
| 4                                               | 8 (4.2)    |
| 5                                               | 1 (0.5)    |
| <b>McCabe index</b>                             |            |
| Nonfatal disease                                | 133 (70.7) |
| Ultimately fatal disease                        | 45 (23.9)  |
| Rapidly fatal disease                           | 10 (5.3)   |
| <b>Mean days of admission</b>                   | 14         |
| <b>Discharges</b>                               | 98         |
| <b>Deaths</b>                                   | 43         |

23

379

24

380 **Table 2**  
381 **Logistic regression analysis on the relationships of signs and symptoms with deaths for COVID-**  
382 **19.**

383

| <b>Variable</b>                     | <b>B</b> | <b>SE</b> | <b>Exp (B)</b> | <b>p-value</b> |
|-------------------------------------|----------|-----------|----------------|----------------|
| Fever                               | 1.107    | 0.554     | 3.024          | 0.046          |
| Cough                               | 0.068    | 0.544     | 1.070          | 0.901          |
| Pneumonia                           | -1.167   | 0.579     | 0.311          | 0.044          |
| Odynophagia                         | -1.473   | 1.044     | 0.229          | 0.159          |
| Chills                              | -0.897   | 0.675     | 0.408          | 0.184          |
| Acute respiratory distress syndrome | 3.074    | 1.010     | 21.636         | 0.002          |
| Other respiratory symptoms          | 1.084    | 0.566     | 2.956          | 0.083          |
| Vomiting                            | -0.617   | 1.265     | 0.539          | 0.625          |
| Diarrhea                            | -0.712   | 0.595     | 0.491          | 0.232          |
| Age                                 | 0.085    | 0.019     | 1.088          | <0.001         |
| Gender                              | 0.884    | 0.511     | 2.420          | 0.084          |
| Smoking status                      | -0.393   | 0.545     | 0.675          | 0.471          |
| Alcohol status                      | 0.571    | 0.807     | 1.769          | 0.479          |
| Constant                            | -8.323   | 1.644     | 0.000          | < 0.001        |

384

385 Model summary: log-likelihood(-2) = 145.848;  $r^2$  Cox & Snell = 0.268;  $r^2$  Nagelkerke= 0.405;  $p$

386 <0.001. B: Non-standardized  $\beta$  coefficient. SE: Standard error of B.



25

387 **Table 3**

388 **Logistic regression analysis on the relationships of comorbidities with deaths for COVID-19.**

389

| <b>Variable</b>               | <b>B</b> | <b>SE</b> | <b>Exp (B)</b> | <b>p-value</b> |
|-------------------------------|----------|-----------|----------------|----------------|
| Type 2 diabetes mellitus      | 0.914    | 0.424     | 2.493          | 0.031          |
| Cardiovascular diseases       | 0.175    | 0.476     | 1.191          | 0.714          |
| Chronic liver diseases        | -0.958   | 1.287     | 0.384          | 0.457          |
| Chronic lung diseases         | 0.249    | 0.562     | 1.282          | 0.658          |
| Chronic kidney diseases       | -0.301   | 0.539     | 0.740          | 0.576          |
| Chronic neurological diseases | 0.109    | 0.483     | 1.115          | 0.822          |
| Cancer                        | 1.313    | 0.506     | 3.719          | 0.009          |
| Age                           | 0.064    | 0.019     | 1.066          | 0.001          |
| Gender                        | 1.077    | 0.465     | 2.936          | 0.021          |
| Smoking status                | -0.474   | 0.551     | 0.622          | 0.390          |
| Alcohol status                | -0.148   | 0.801     | 0.862          | 0.853          |
| Constant                      | -7.010   | 1.441     | 0.001          | < 0.001        |

390

391 Model summary: log-likelihood(-2) = 158.620;  $r^2$  Cox & Snell = 0.217;  $r^2$  Nagelkerke= 0.327;  $p$

392 <0.001. B: Non-standardized  $\beta$  coefficient. SE: Standard error of B.

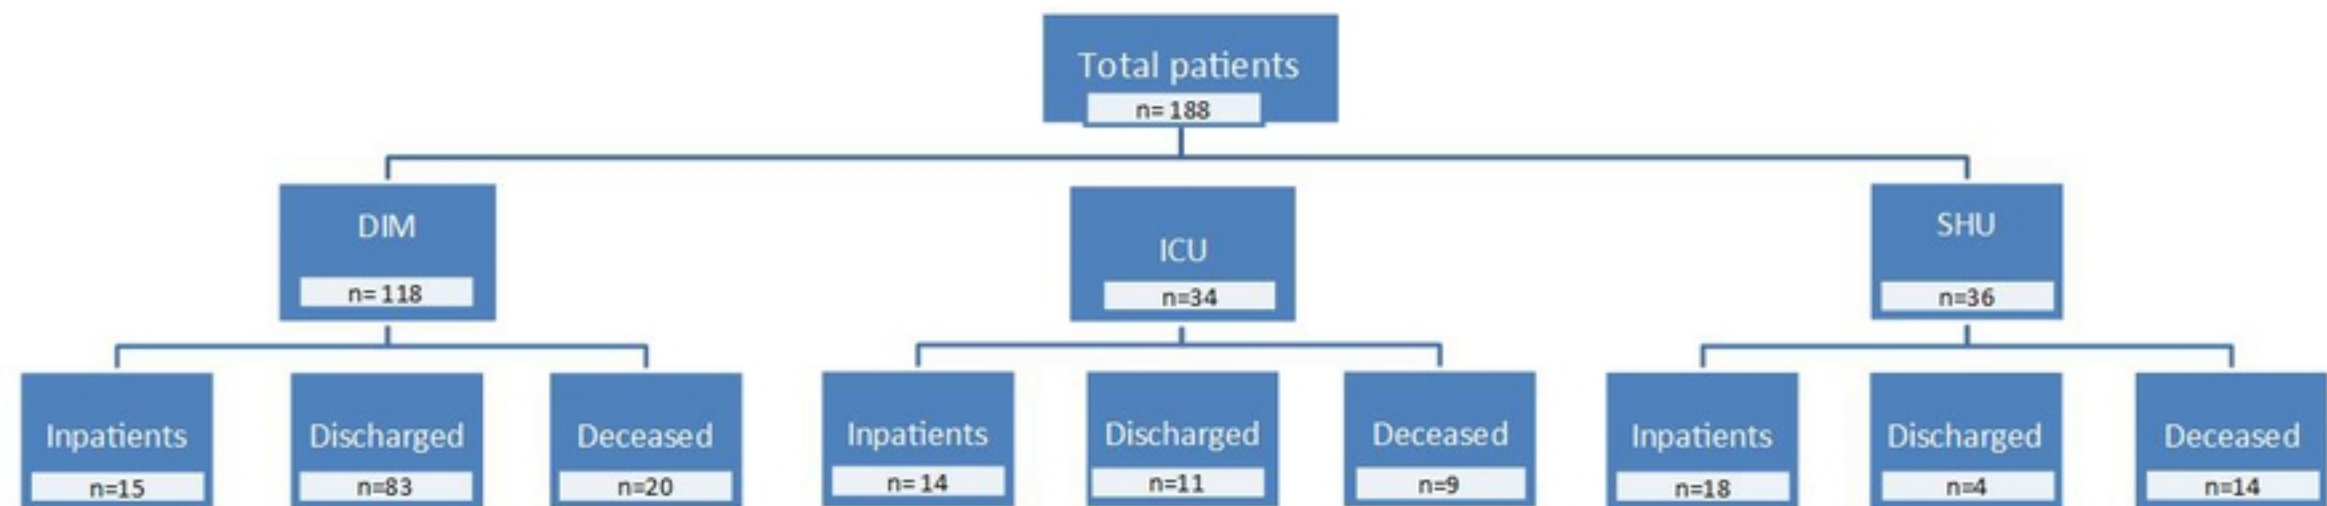

Figure 1

Deaths  
Cases

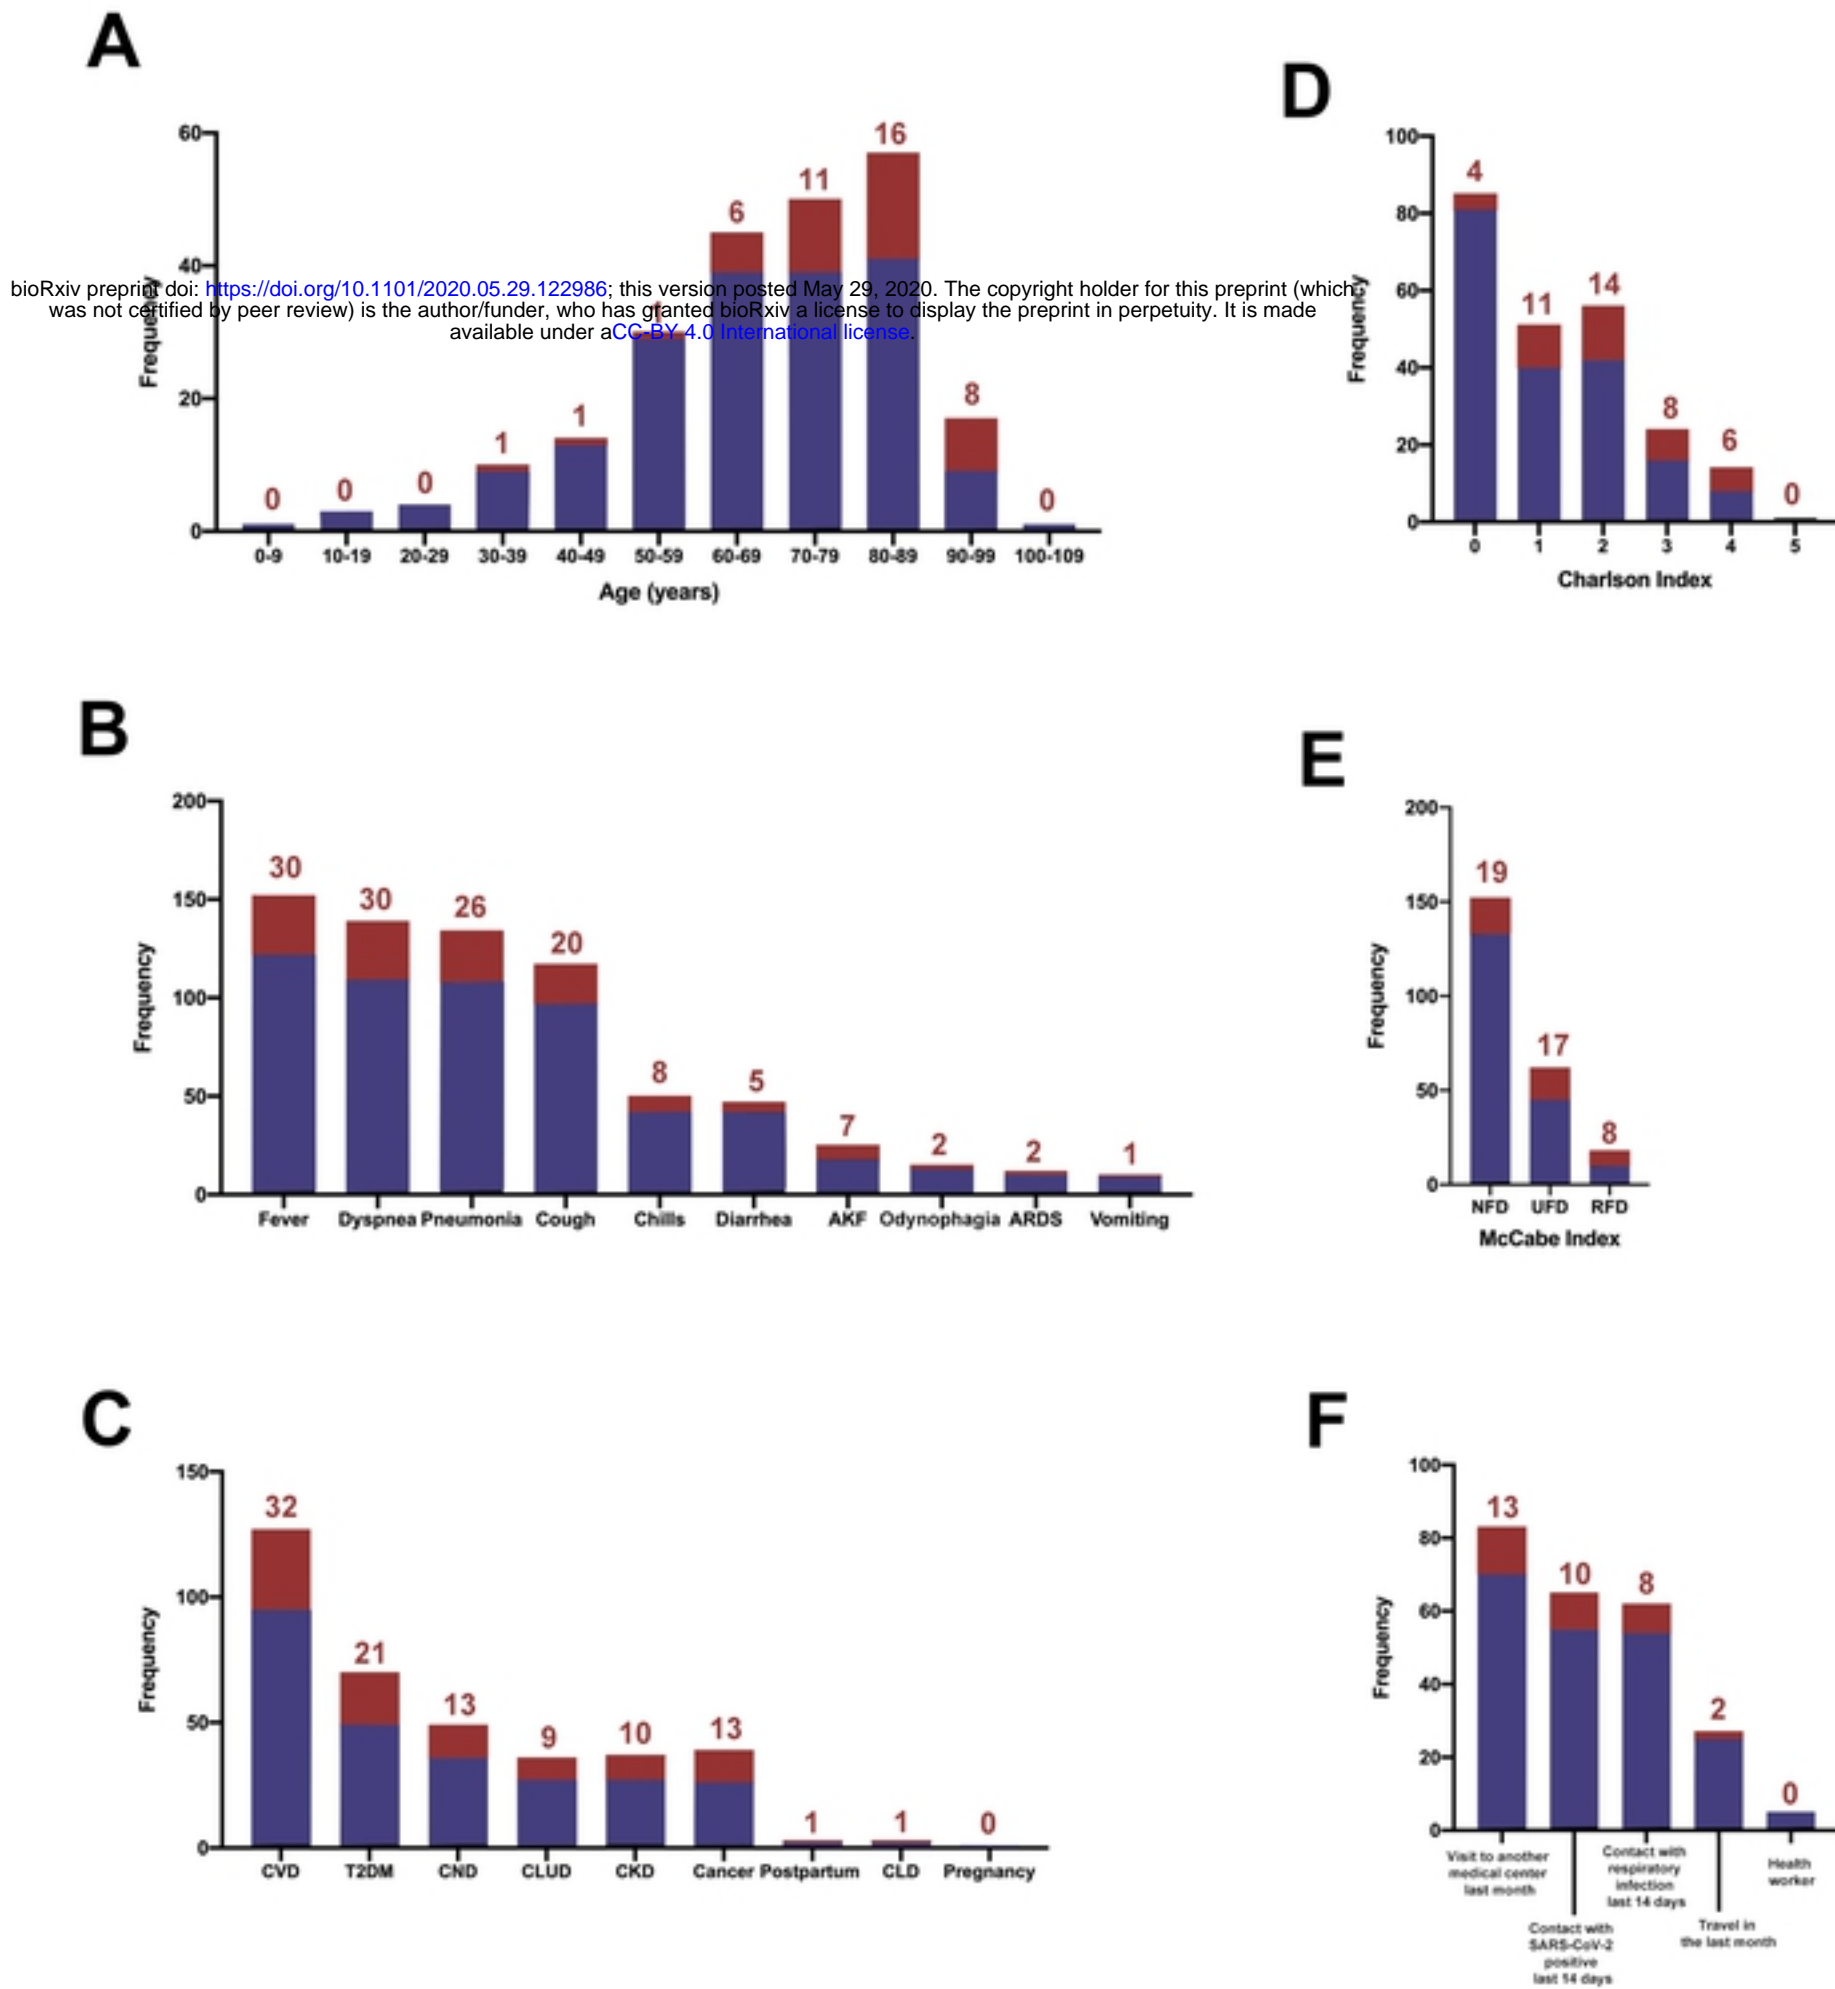

Figure 2

bioRxiv preprint doi: <https://doi.org/10.1101/2020.05.29.122986>; this version posted May 29, 2020. The copyright holder for this preprint (which was not certified by peer review) is the author/funder, who has granted bioRxiv a license to display the preprint in perpetuity. It is made available under aCC-BY 4.0 International license.

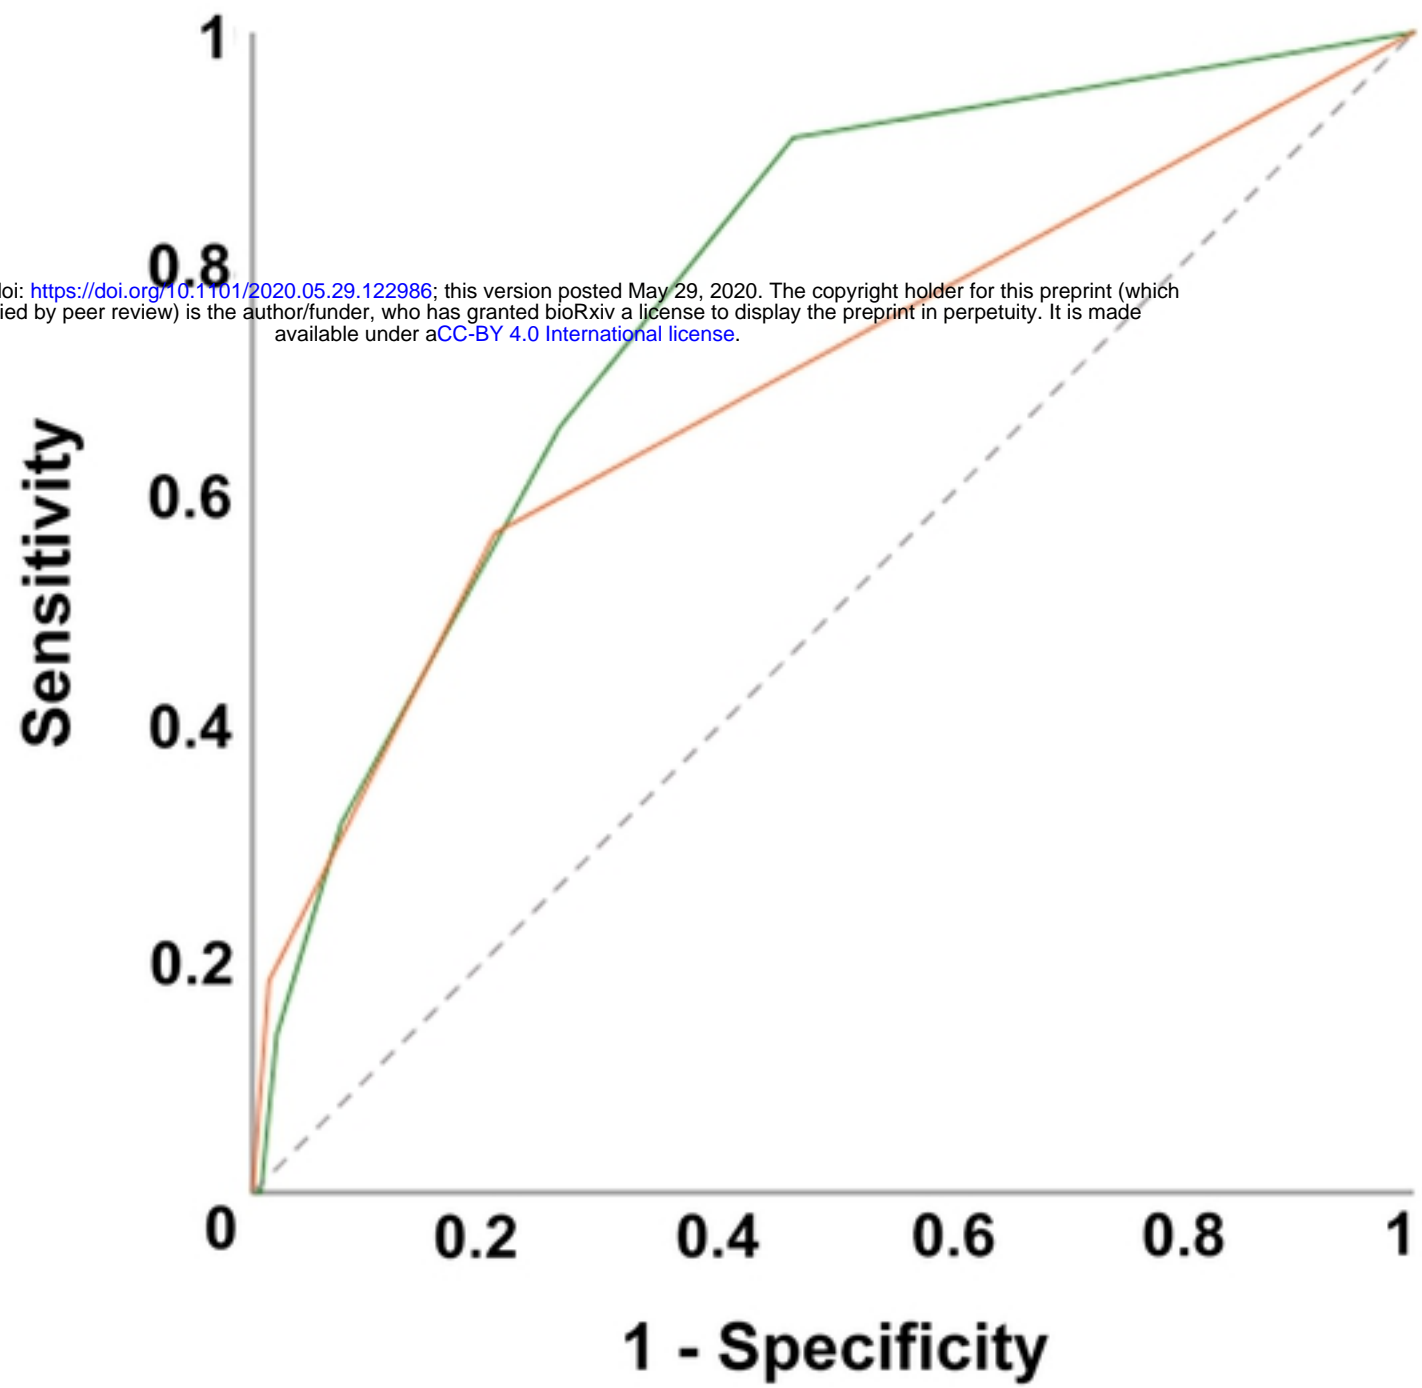

## AUC

- Charlson Index: 0.774 (0.698 - 0.849)
- McCabe Index: 0.695 (0.598 - 0.792)

Figure 3
